# Supplementary material for: Learning representations of chromatin contacts using a recurrent neural network identifies genomic drivers of conformation
Source: PubMed Central journal article supplement (PMC9240038; doi:10.1038/s41467-022-31337-w), 2022-06-28
Supplement: 41467_2022_31337_MOESM4_ESM.pdf [file 41467_2022_31337_MOESM4_ESM.pdf]

**Title:** Supplementary Data 1

**Description:** contains the ranking of transcription factor binding sites (TFBS) according to the aggregated feature importance scores.
